# Supplementary material for: Identification of potential blood biomarkers for early diagnosis of Alzheimer’s disease through immune landscape analysis
Source: PubMed Central journal article supplement (PMC9636153; doi:10.1038/s41514-022-00096-9), 2022-11-04
Supplement: 41514_2022_96_MOESM1_ESM.pdf [file 41514_2022_96_MOESM1_ESM.pdf]

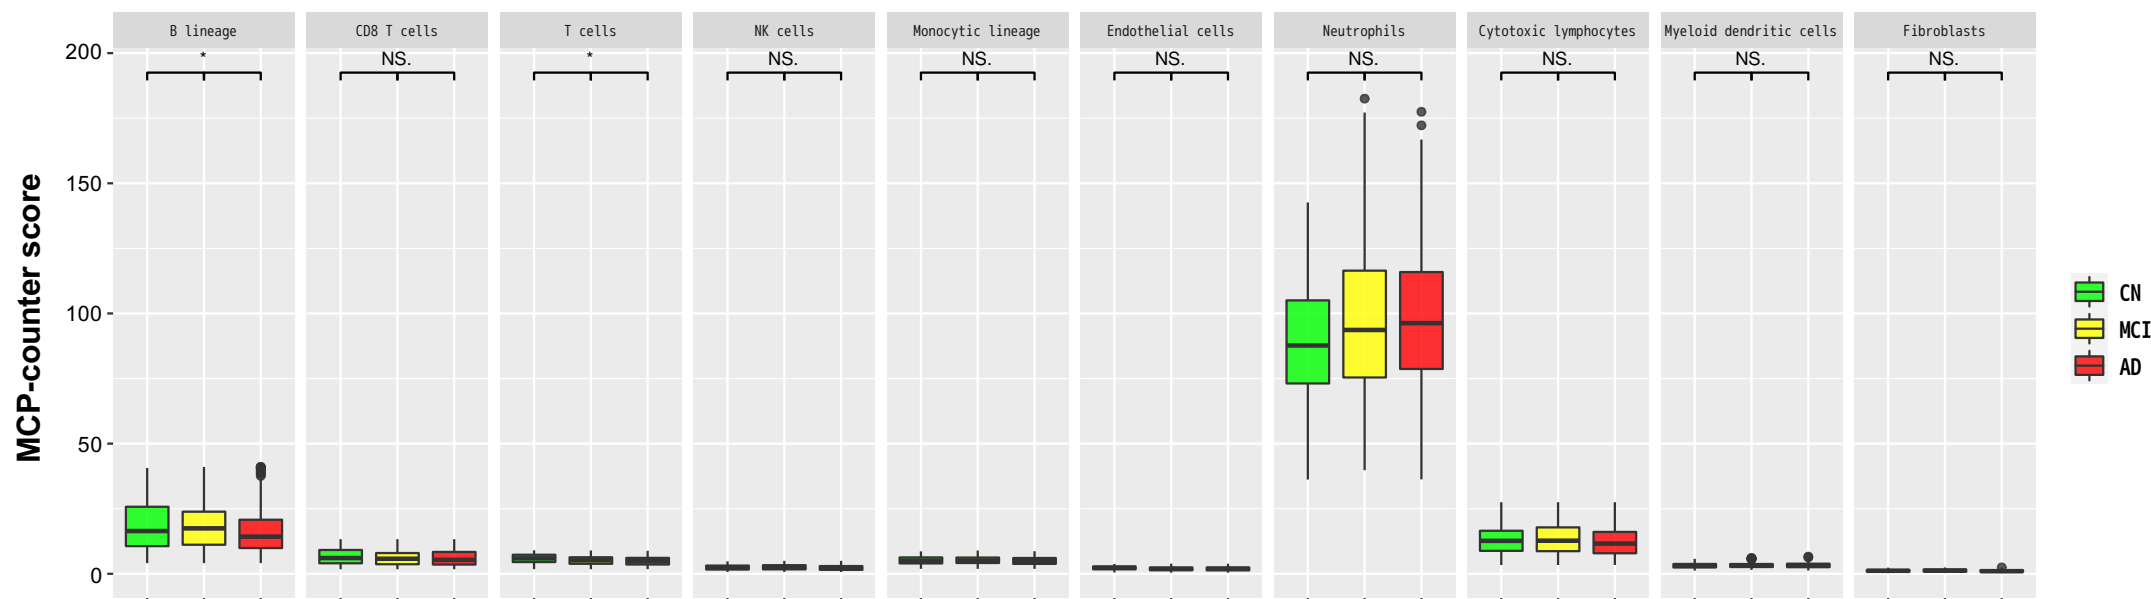

**Supplementary Figure 1. Robust quantification of the absolute abundance of 10 immune and stromal cell populations.**

Comparison of cell populations among samples from patients with Alzheimer’s disease (AD), mild cognitive impairment (MCI), and normal cognition (CN) (\*FDR < 0.05, Jonckheere–Terpstra trend test). Data are represented as box and whisker plots, depicting minimum, lower quartile (Q1), median (Q2), upper quartile (Q3), and maximum values.

**Supplementary Table 1. Differential composition of immune-cell types and clonal diversity of TCRs and BCRs between MCI-C and MCI-NC samples**

| Tool        | comparison  | type                   | <i>P</i> * | FDR   |
|-------------|-------------|------------------------|------------|-------|
| CIBERSORT   | immune-cell | B cells                | 0.668      | 1.000 |
|             |             | Plasma cells           | 0.686      | 1.000 |
|             |             | CD8 T cells            | 0.262      | 1.000 |
|             |             | CD4 T cells            | 0.626      | 1.000 |
|             |             | $\gamma\delta$ T cells | 0.111      | 1.000 |
|             |             | NK cells               | 0.755      | 1.000 |
|             |             | Monocytes              | 0.262      | 1.000 |
|             |             | Macrophages            | 0.672      | 1.000 |
|             |             | Dendritic cells        | 0.986      | 1.000 |
|             |             | Mast cells             | 0.793      | 1.000 |
|             |             | Eosinophils            | 1.000      | 1.000 |
|             |             | Neutrophils            | 0.347      | 1.000 |
| MCP-counter | immune-cell | B lineage              | 0.998      | 1.000 |
|             |             | CD8 T cells            | 0.449      | 1.000 |
|             |             | T cells                | 0.139      | 1.000 |
|             |             | NK cells               | 0.862      | 1.000 |
|             |             | Monocytic lineage      | 0.994      | 1.000 |
|             |             | Endothelial cells      | 0.261      | 1.000 |
|             |             | Neutrophils            | 0.090      | 0.898 |

|        |                  |                         |       |       |
|--------|------------------|-------------------------|-------|-------|
|        |                  | Cytotoxic lymphocytes   | 0.582 | 1.000 |
|        |                  | Myeloid dendritic cells | 0.876 | 1.000 |
|        |                  | Fibroblasts             | 0.336 | 1.000 |
| TRUST4 | clonal diversity | IGH                     | 0.381 | 0.781 |
|        |                  | IGK                     | 0.139 | 0.781 |
|        |                  | IGL                     | 0.747 | 0.781 |
|        |                  | TRA                     | 0.307 | 0.781 |
|        |                  | TRB                     | 0.649 | 0.781 |
|        |                  | TRD                     | 0.741 | 0.781 |
|        |                  | TRG                     | 0.781 | 0.781 |

\*: Statistically significant differences in cell-type proportions between MCI-C and MCI-NC samples were assessed with the Jonckheere–Terpstra trend test. A linear regression model with adjustment for age and sex was used to identify statistically significant increases or decreases in the clonal diversity of TCR and BCR repertoires between MCI-C and MCI-NC samples.

**Supplementary Table 2. The association between genetic variants on *WDR37* and MCI-to-AD conversion**

| chromosome | position | SNP ID      | variant | A1 allele | A2 allele                     | MCI-C<br>(A1/A1A2/A2) | MCI-NC<br>(A1/A1A2/A2) | <i>P</i> * |
|------------|----------|-------------|---------|-----------|-------------------------------|-----------------------|------------------------|------------|
| 10         | 1102613  | rs2306403   | SNV     | A         | C                             | 0/2/8                 | 0/6/11                 | 0.6655     |
| 10         | 1102710  | rs11250244  | SNV     | A         | C                             | 0/3/7                 | 0/6/11                 | 1          |
| 10         | 1102796  | rs35656218  | SNV     | C         | G                             | 0/5/5                 | 3/6/8                  | 0.4714     |
| 10         | 1102868  | rs10047382  | SNV     | C         | T                             | 0/1/4                 | 0/0/2                  | 1          |
| 10         | 1103058  | rs10047269  | SNV     | A         | G                             | 0/1/4                 | 0/0/2                  | 1          |
| 10         | 1103095  | rs10047383  | SNV     | G         | A                             | 0/1/4                 | 0/0/2                  | 1          |
| 10         | 1103253  | rs147745963 | INDEL   | G         | GGGCGCT<br>GGAGGGC<br>CCGGGGC | 0/1/4                 | 0/0/2                  | 1          |
| 10         | 1103265  | 10:1103265  | INDEL   | GCCC      | G                             | 1/1/8                 | 0/1/16                 | 0.4575     |
| 10         | 1103590  | rs35657988  | SNV     | G         | A                             | 0/1/9                 | 0/1/16                 | 1          |
| 10         | 1104027  | 10:1104027  | INDEL   | G         | GGAGTTA                       | 0/6/4                 | 4/5/8                  | 0.177      |
| 10         | 1104257  | rs12268949  | SNV     | G         | A                             | 0/1/4                 | 0/0/2                  | 1          |
| 10         | 1105019  | rs7101191   | SNV     | C         | A                             | 0/2/8                 | 0/6/11                 | 0.6655     |
| 10         | 1105171  | rs75431717  | SNV     | A         | C                             | 0/1/9                 | 0/1/16                 | 1          |
| 10         | 1105322  | rs72760934  | SNV     | A         | G                             | 0/1/9                 | 0/1/16                 | 1          |
| 10         | 1105473  | rs7071670   | SNV     | A         | T                             | 0/1/4                 | 0/0/2                  | 1          |
| 10         | 1105967  | 10:1105967  | SNV     | T         | C                             | 0/1/9                 | 0/0/17                 | 0.3704     |
| 10         | 1107341  | rs7093915   | SNV     | T         | C                             | 0/1/4                 | 0/0/2                  | 1          |
| 10         | 1107422  | rs72760935  | SNV     | G         | A                             | 0/1/9                 | 0/1/15                 | 1          |

|    |         |             |     |   |   |        |        |        |
|----|---------|-------------|-----|---|---|--------|--------|--------|
| 10 | 1107476 | rs190535952 | SNV | T | C | 0/1/7  | 0/0/16 | 0.3333 |
| 10 | 1107697 | rs7093383   | SNV | G | T | 0/1/9  | 0/5/12 | 0.3625 |
| 10 | 1107888 | rs181489269 | SNV | G | A | 0/0/10 | 0/1/16 | 1      |
| 10 | 1108544 | rs10903359  | SNV | G | T | 0/3/7  | 0/7/10 | 0.6919 |
| 10 | 1109356 | rs201435385 | SNV | T | C | 0/1/5  | 0/0/16 | 0.2727 |
| 10 | 1110231 | rs7100114   | SNV | G | A | 0/1/4  | 0/0/2  | 1      |
| 10 | 1110369 | rs147957107 | SNV | T | C | 0/1/9  | 0/0/17 | 0.3704 |
| 10 | 1110576 | rs11250245  | SNV | A | C | 0/1/0  | 0/0/0  | 1      |
| 10 | 1112149 | rs11815047  | SNV | C | G | 0/2/8  | 0/1/16 | 0.535  |
| 10 | 1112266 | rs7079564   | SNV | C | T | 0/7/3  | 1/5/11 | 0.1071 |
| 10 | 1112277 | 10:1112277  | SNV | T | C | 0/0/5  | 0/1/14 | 1      |
| 10 | 1112278 | rs11250246  | SNV | A | G | 0/2/8  | 1/6/10 | 0.6347 |
| 10 | 1112280 | rs201266334 | SNV | T | A | 0/0/10 | 0/1/16 | 1      |
| 10 | 1112291 | rs188637100 | SNV | C | T | 0/0/10 | 0/1/16 | 1      |
| 10 | 1112298 | 10:1112298  | SNV | T | C | 0/0/8  | 0/1/16 | 1      |
| 10 | 1112300 | rs116959157 | SNV | C | T | 0/0/10 | 0/1/16 | 1      |
| 10 | 1112303 | rs201001931 | SNV | G | A | 0/0/10 | 0/1/16 | 1      |
| 10 | 1112309 | rs145416272 | SNV | G | A | 0/0/10 | 0/1/16 | 1      |
| 10 | 1112357 | rs187039752 | SNV | A | G | 0/1/7  | 0/1/15 | 1      |
| 10 | 1112421 | rs10903360  | SNV | A | G | 0/6/4  | 3/7/7  | 0.4009 |
| 10 | 1113305 | rs2127605   | SNV | G | C | 0/6/4  | 4/5/8  | 0.177  |
| 10 | 1114339 | rs10444196  | SNV | G | A | 0/6/4  | 3/5/8  | 0.23   |

|    |         |             |     |   |   |        |        |        |
|----|---------|-------------|-----|---|---|--------|--------|--------|
| 10 | 1116042 | rs193178104 | SNV | G | A | 0/0/9  | 1/0/16 | 1      |
| 10 | 1116294 | rs4519019   | SNV | G | A | 0/6/4  | 4/5/8  | 0.177  |
| 10 | 1116671 | rs2387217   | SNV | G | A | 0/2/8  | 0/6/11 | 0.6655 |
| 10 | 1117459 | rs80141980  | SNV | T | G | 0/1/8  | 0/5/12 | 0.3798 |
| 10 | 1117514 | rs11250250  | SNV | C | T | 0/2/8  | 0/6/11 | 0.6655 |
| 10 | 1117764 | rs7083203   | SNV | T | C | 0/4/6  | 1/5/11 | 0.8064 |
| 10 | 1118301 | rs191792429 | SNV | T | C | 0/0/10 | 0/2/15 | 0.5157 |
| 10 | 1119203 | rs10508203  | SNV | G | A | 0/4/6  | 1/5/11 | 0.8064 |
| 10 | 1119848 | 10:1119848  | SNV | A | G | 0/0/5  | 0/1/14 | 1      |
| 10 | 1120061 | rs141413817 | SNV | C | A | 0/0/10 | 0/1/16 | 1      |
| 10 | 1120097 | 10:1120097  | SNV | G | A | 0/1/9  | 0/0/17 | 0.3704 |
| 10 | 1120236 | rs41299206  | SNV | C | T | 0/1/4  | 0/0/2  | 1      |
| 10 | 1120394 | 10:1120394  | SNV | A | G | 0/0/5  | 0/1/14 | 1      |
| 10 | 1120600 | rs7070991   | SNV | A | G | 0/1/9  | 0/1/16 | 1      |
| 10 | 1120884 | rs7072276   | SNV | T | C | 0/4/6  | 1/5/11 | 0.8064 |
| 10 | 1121381 | rs55701841  | SNV | C | T | 0/5/3  | 4/5/7  | 0.2709 |
| 10 | 1121814 | rs10219038  | SNV | A | G | 0/1/4  | 0/0/2  | 1      |
| 10 | 1121939 | rs76732489  | SNV | T | C | 0/1/4  | 0/0/2  | 1      |
| 10 | 1122895 | 10:1122895  | SNV | G | A | 0/0/9  | 0/1/14 | 1      |
| 10 | 1123453 | rs7085063   | SNV | T | G | 0/1/9  | 0/5/12 | 0.3625 |
| 10 | 1123937 | rs144312898 | SNV | A | T | 0/0/9  | 0/1/16 | 1      |
| 10 | 1124186 | rs143298688 | SNV | C | T | 0/0/10 | 0/1/16 | 1      |

|    |         |             |       |                                  |      |        |        |        |
|----|---------|-------------|-------|----------------------------------|------|--------|--------|--------|
| 10 | 1124531 | rs7091030   | SNV   | T                                | C    | 0/1/9  | 0/1/16 | 1      |
| 10 | 1124939 | rs11250252  | SNV   | C                                | G    | 0/1/4  | 0/0/2  | 1      |
| 10 | 1125147 | rs10794715  | SNV   | C                                | T    | 0/6/4  | 4/5/8  | 0.177  |
| 10 | 1125160 | rs149683159 | SNV   | A                                | G    | 0/1/9  | 1/1/15 | 1      |
| 10 | 1125327 | rs202070825 | INDEL | G                                | GAAT | 0/1/9  | 1/1/15 | 1      |
| 10 | 1125344 | rs147803324 | SNV   | A                                | G    | 0/0/10 | 0/1/16 | 1      |
| 10 | 1125397 | rs146023579 | INDEL | GACCCTGA<br>TAGCAGTG<br>TCTTCCAC | G    | 0/1/9  | 1/5/11 | 0.4544 |
| 10 | 1125769 | rs11250253  | SNV   | C                                | A    | 0/2/8  | 0/6/11 | 0.6655 |
| 10 | 1126293 | rs7087381   | SNV   | C                                | T    | 0/6/4  | 4/5/8  | 0.177  |
| 10 | 1126619 | rs7084283   | SNV   | G                                | A    | 0/6/4  | 4/5/8  | 0.177  |
| 10 | 1126866 | rs74120451  | SNV   | C                                | T    | 0/1/4  | 0/0/2  | 1      |
| 10 | 1126904 | rs7101036   | SNV   | A                                | C    | 0/1/9  | 0/1/16 | 1      |
| 10 | 1126969 | rs7101059   | SNV   | G                                | C    | 0/1/9  | 0/1/16 | 1      |
| 10 | 1127151 | rs57019561  | INDEL | TG                               | T    | 0/1/9  | 0/1/16 | 1      |
| 10 | 1127230 | rs17155873  | SNV   | T                                | G    | 0/1/9  | 0/1/16 | 1      |
| 10 | 1128103 | rs370140003 | SNV   | T                                | C    | 0/1/9  | 0/1/16 | 1      |
| 10 | 1128165 | rs78493356  | SNV   | G                                | A    | 0/1/9  | 0/0/17 | 0.3704 |
| 10 | 1128216 | rs7074721   | SNV   | G                                | A    | 0/6/4  | 4/5/8  | 0.177  |
| 10 | 1128238 | rs60503326  | SNV   | A                                | G    | 0/1/9  | 0/1/16 | 1      |
| 10 | 1128663 | rs200855697 | INDEL | C                                | CAT  | 0/1/8  | 0/1/11 | 1      |
| 10 | 1128812 | rs11819230  | SNV   | G                                | A    | 0/1/4  | 0/0/2  | 1      |

|    |         |             |       |    |   |        |        |        |
|----|---------|-------------|-------|----|---|--------|--------|--------|
| 10 | 1128950 | rs11250254  | SNV   | A  | G | 0/2/8  | 0/6/11 | 0.6655 |
| 10 | 1129527 | rs7080072   | SNV   | T  | G | 0/1/9  | 0/5/12 | 0.3625 |
| 10 | 1129680 | rs148186629 | SNV   | T  | C | 0/0/10 | 1/0/16 | 1      |
| 10 | 1129814 | rs7080500   | SNV   | A  | G | 0/3/7  | 0/6/11 | 1      |
| 10 | 1130127 | rs7093837   | SNV   | T  | C | 0/1/9  | 0/1/16 | 1      |
| 10 | 1130756 | rs10903361  | SNV   | A  | G | 0/6/4  | 4/5/8  | 0.177  |
| 10 | 1131050 | 10:1131050  | SNV   | A  | G | 0/0/8  | 1/0/15 | 1      |
| 10 | 1131177 | rs59784176  | SNV   | T  | G | 0/1/9  | 0/1/16 | 1      |
| 10 | 1131270 | rs57295313  | INDEL | TC | T | 0/1/9  | 0/1/16 | 1      |
| 10 | 1131325 | rs117348574 | SNV   | G  | C | 0/1/9  | 0/2/15 | 1      |
| 10 | 1131398 | rs191077947 | SNV   | A  | G | 0/1/9  | 0/0/17 | 0.3704 |
| 10 | 1132132 | rs7914308   | SNV   | C  | T | 0/1/9  | 0/1/16 | 1      |
| 10 | 1132848 | rs7069496   | SNV   | C  | G | 0/1/9  | 0/1/16 | 1      |
| 10 | 1132852 | rs2279256   | SNV   | A  | G | 0/1/9  | 0/1/16 | 1      |
| 10 | 1133004 | rs137942892 | SNV   | T  | C | 0/1/9  | 0/1/16 | 1      |
| 10 | 1133161 | rs117064546 | SNV   | T  | C | 0/2/8  | 0/2/15 | 0.6125 |
| 10 | 1133435 | 10:1133435  | SNV   | T  | C | 0/1/4  | 0/0/15 | 0.25   |
| 10 | 1133628 | rs1871625   | SNV   | T  | A | 0/4/6  | 1/5/11 | 0.8064 |
| 10 | 1133974 | rs2101050   | SNV   | C  | T | 0/6/4  | 4/5/8  | 0.177  |
| 10 | 1134335 | rs11250256  | SNV   | G  | A | 0/6/4  | 4/5/8  | 0.177  |
| 10 | 1135221 | rs4880473   | SNV   | T  | C | 0/2/8  | 1/4/12 | 1      |
| 10 | 1135248 | rs4880474   | SNV   | T  | C | 0/1/9  | 0/5/12 | 0.3625 |



|    |         |             |       |   |                                         |        |        |        |
|----|---------|-------------|-------|---|-----------------------------------------|--------|--------|--------|
| 10 | 1135520 | 10:1135520  | SNV   | G | A                                       | 0/1/9  | 0/0/17 | 0.3704 |
| 10 | 1135642 | rs201335374 | INDEL | C | CGTGCTCA<br>CCCGCAAT<br>TCAACCTT<br>CCT | 0/2/8  | 0/6/11 | 0.6655 |
| 10 | 1135757 | rs34766854  | SNV   | T | C                                       | 0/6/4  | 4/6/7  | 0.2837 |
| 10 | 1136330 | rs7076083   | SNV   | C | T                                       | 0/6/4  | 4/5/8  | 0.177  |
| 10 | 1136357 | rs182614153 | SNV   | T | C                                       | 0/0/10 | 0/1/16 | 1      |
| 10 | 1136557 | rs59961913  | INDEL | T | TC                                      | 0/2/8  | 0/5/12 | 0.6784 |
| 10 | 1137009 | rs149466850 | INDEL | C | CAG                                     | 0/0/8  | 0/2/15 | 1      |
| 10 | 1137266 | rs10903362  | SNV   | T | G                                       | 0/6/4  | 4/5/8  | 0.177  |
| 10 | 1137842 | rs11250258  | SNV   | T | C                                       | 0/6/4  | 4/5/8  | 0.177  |
| 10 | 1137992 | 10:1137992  | SNV   | T | C                                       | 0/0/5  | 0/1/14 | 1      |
| 10 | 1138044 | 10:1138044  | SNV   | C | T                                       | 0/0/6  | 0/2/13 | 1      |
| 10 | 1138168 | rs10903365  | SNV   | C | T                                       | 0/2/3  | 1/1/0  | 0.5714 |
| 10 | 1138370 | 10:1138370  | SNV   | A | G                                       | 0/0/10 | 0/1/16 | 1      |
| 10 | 1138534 | rs67388830  | SNV   | A | G                                       | 0/6/4  | 4/5/8  | 0.177  |
| 10 | 1138620 | rs7921047   | SNV   | A | G                                       | 0/1/9  | 0/1/16 | 1      |
| 10 | 1139183 | rs10159718  | SNV   | G | A                                       | 0/6/4  | 4/5/8  | 0.177  |
| 10 | 1139469 | 10:1139469  | SNV   | C | G                                       | 0/0/8  | 0/2/14 | 0.5362 |
| 10 | 1139628 | rs142664072 | SNV   | G | A                                       | 0/0/10 | 0/1/16 | 1      |
| 10 | 1139825 | rs10903366  | SNV   | G | A                                       | 0/6/4  | 4/5/8  | 0.177  |
| 10 | 1140864 | rs183185700 | SNV   | A | G                                       | 0/0/10 | 0/1/16 | 1      |

|    |         |             |       |   |     |        |        |        |
|----|---------|-------------|-------|---|-----|--------|--------|--------|
| 10 | 1140962 | 10:1140962  | INDEL | C | CAT | 0/1/9  | 0/1/15 | 1      |
| 10 | 1141102 | rs10903367  | SNV   | G | A   | 0/2/3  | 1/1/0  | 0.5714 |
| 10 | 1141183 | rs12569814  | SNV   | A | G   | 0/6/4  | 3/5/7  | 0.2751 |
| 10 | 1141666 | rs56201968  | SNV   | G | A   | 0/1/9  | 0/1/16 | 1      |
| 10 | 1141749 | rs3816735   | SNV   | A | G   | 0/6/4  | 4/5/8  | 0.177  |
| 10 | 1142424 | rs10794717  | SNV   | G | A   | 0/4/6  | 0/8/9  | 1      |
| 10 | 1142571 | rs36062650  | SNV   | C | T   | 0/1/9  | 0/1/16 | 1      |
| 10 | 1142595 | rs72760942  | SNV   | A | G   | 0/1/9  | 0/2/15 | 1      |
| 10 | 1142750 | rs10794718  | SNV   | T | C   | 0/5/5  | 4/5/8  | 0.2826 |
| 10 | 1142860 | rs59245488  | SNV   | T | A   | 0/1/9  | 0/1/16 | 1      |
| 10 | 1142898 | rs180728743 | SNV   | C | G   | 0/0/10 | 0/2/15 | 0.5157 |
| 10 | 1143212 | rs67615426  | SNV   | A | G   | 0/1/9  | 0/1/16 | 1      |
| 10 | 1143250 | rs145542675 | SNV   | T | C   | 0/1/9  | 0/1/16 | 1      |
| 10 | 1143254 | rs116887570 | SNV   | A | G   | 0/0/10 | 0/1/16 | 1      |
| 10 | 1143827 | rs12784270  | SNV   | C | T   | 0/6/4  | 4/6/7  | 0.2837 |
| 10 | 1144049 | rs7067536   | SNV   | T | C   | 0/1/9  | 0/1/16 | 1      |
| 10 | 1144254 | rs117014471 | SNV   | G | C   | 0/3/7  | 1/3/13 | 0.776  |
| 10 | 1144594 | 10:1144594  | INDEL | C | CT  | 0/0/5  | 0/1/14 | 1      |
| 10 | 1144630 | rs3793774   | SNV   | G | A   | 1/5/4  | 4/6/7  | 0.8709 |
| 10 | 1145182 | rs17155886  | SNV   | G | A   | 0/2/8  | 0/1/16 | 0.535  |
| 10 | 1145284 | rs34964132  | SNV   | A | C   | 0/5/5  | 0/7/10 | 0.7063 |
| 10 | 1145473 | rs11250260  | SNV   | A | T   | 0/6/4  | 4/6/7  | 0.2837 |

|    |         |             |       |   |          |       |        |         |
|----|---------|-------------|-------|---|----------|-------|--------|---------|
| 10 | 1145635 | rs11250261  | SNV   | A | G        | 0/1/9 | 0/7/10 | 0.1895  |
| 10 | 1145697 | rs144775512 | SNV   | C | T        | 0/1/9 | 0/0/16 | 0.3846  |
| 10 | 1145707 | rs74117831  | SNV   | C | A        | 0/2/7 | 0/1/15 | 0.5304  |
| 10 | 1145768 | 10:1145768  | SNV   | A | G        | 0/1/4 | 0/0/15 | 0.25    |
|    |         |             |       |   | AGTGGTGG |       |        |         |
|    |         |             |       |   | AGAGGTGA |       |        |         |
|    |         |             |       |   | GGAGGGT  |       |        |         |
|    |         |             |       |   | GAGCACTG |       |        |         |
| 10 | 1145839 | 10:1145839  | INDEL | A | ATGCTCAG | 0/1/9 | 0/7/9  | 0.09885 |
|    |         |             |       |   | GAAATTCA |       |        |         |
|    |         |             |       |   | AAATGTGC |       |        |         |
|    |         |             |       |   | ACTGATGG |       |        |         |
|    |         |             |       |   | TGGGC    |       |        |         |
| 10 | 1146169 | rs57514701  | SNV   | A | G        | 0/2/8 | 0/1/16 | 0.535   |
| 10 | 1146223 | rs58551457  | SNV   | A | G        | 0/1/2 | 0/1/0  | 1       |
| 10 | 1146226 | rs143886758 | INDEL | G | GCACTGCA | 0/6/4 | 4/6/7  | 0.2837  |
| 10 | 1147138 | rs11250263  | SNV   | G | A        | 0/2/8 | 0/5/12 | 0.6784  |
| 10 | 1148157 | rs11818314  | SNV   | C | G        | 0/1/4 | 0/0/2  | 1       |
| 10 | 1148301 | 10:1148301  | SNV   | C | T        | 0/1/9 | 0/0/16 | 0.3846  |
| 10 | 1148336 | rs113148608 | INDEL | T | TA       | 0/1/9 | 0/1/16 | 1       |
| 10 | 1148619 | rs149876336 | SNV   | T | C        | 0/2/8 | 0/0/17 | 0.1282  |
| 10 | 1148672 | rs10903368  | SNV   | G | C        | 0/3/7 | 0/7/10 | 0.6919  |
| 10 | 1149390 | rs7915650   | SNV   | A | C        | 0/2/8 | 0/5/12 | 0.6784  |

|    |         |             |       |                                 |     |        |        |        |
|----|---------|-------------|-------|---------------------------------|-----|--------|--------|--------|
| 10 | 1150082 | 10:1150082  | INDEL | TGACGGCC<br>TCATGGTTT T<br>CCCA |     | 0/0/6  | 0/1/15 | 1      |
| 10 | 1151620 | rs4880765   | SNV   | G                               | A   | 2/4/4  | 4/6/7  | 1      |
| 10 | 1151681 | 10:1151681  | SNV   | T                               | C   | 0/0/5  | 0/1/14 | 1      |
| 10 | 1151723 | rs11250264  | SNV   | C                               | A   | 0/2/8  | 0/1/16 | 0.535  |
| 10 | 1152067 | rs11250265  | SNV   | C                               | T   | 0/5/5  | 0/7/10 | 0.7063 |
| 10 | 1152480 | rs57552534  | SNV   | A                               | G   | 0/1/9  | 0/1/15 | 1      |
| 10 | 1152862 | rs55886714  | SNV   | G                               | T   | 0/3/7  | 0/6/11 | 1      |
| 10 | 1153222 | rs7894567   | SNV   | G                               | A   | 0/5/5  | 0/7/10 | 0.7063 |
| 10 | 1153725 | rs139821411 | SNV   | T                               | C   | 0/0/10 | 0/1/15 | 1      |
| 10 | 1153731 | rs10903369  | SNV   | C                               | T   | 0/3/7  | 0/7/10 | 0.6919 |
| 10 | 1153749 | rs2387296   | SNV   | G                               | A   | 0/3/7  | 0/7/10 | 0.6919 |
| 10 | 1153816 | rs10736941  | SNV   | C                               | T   | 2/4/4  | 4/6/7  | 1      |
| 10 | 1153856 | rs57242050  | INDEL | C                               | CAT | 0/3/7  | 0/2/15 | 0.3261 |
| 10 | 1154019 | rs4880766   | SNV   | C                               | T   | 2/4/4  | 4/6/7  | 1      |
| 10 | 1154105 | rs4880767   | SNV   | C                               | G   | 0/5/5  | 0/7/10 | 0.7063 |
| 10 | 1154669 | rs3886474   | SNV   | T                               | C   | 0/1/3  | 0/0/1  | 1      |
| 10 | 1155393 | rs74572057  | SNV   | A                               | G   | 0/2/8  | 0/0/17 | 0.1282 |
| 10 | 1155394 | rs61693569  | SNV   | T                               | C   | 0/1/9  | 0/1/16 | 1      |
| 10 | 1155608 | rs72635992  | SNV   | A                               | G   | 0/3/7  | 0/7/10 | 0.6919 |
| 10 | 1155767 | rs11250266  | SNV   | T                               | A   | 0/2/8  | 0/5/12 | 0.6784 |
| 10 | 1156165 | rs10794720  | SNV   | T                               | C   | 0/2/8  | 0/1/16 | 0.535  |

|    |         |             |       |   |     |        |        |        |
|----|---------|-------------|-------|---|-----|--------|--------|--------|
| 10 | 1156499 | rs139376446 | SNV   | G | C   | 0/1/9  | 0/1/16 | 1      |
| 10 | 1156815 | rs7922760   | SNV   | G | C   | 0/2/8  | 0/1/16 | 0.535  |
| 10 | 1156864 | rs10903370  | SNV   | G | A   | 2/4/4  | 4/6/7  | 1      |
| 10 | 1156943 | rs61144178  | INDEL | C | CAT | 0/2/8  | 0/1/16 | 0.535  |
| 10 | 1156994 | rs72760953  | SNV   | C | T   | 0/1/9  | 0/1/16 | 1      |
| 10 | 1157019 | rs59377495  | SNV   | T | C   | 0/2/8  | 0/1/16 | 0.535  |
| 10 | 1157391 | rs182001224 | SNV   | C | G   | 0/1/9  | 0/0/17 | 0.3704 |
| 10 | 1157410 | rs7088740   | SNV   | G | A   | 2/2/6  | 4/5/8  | 0.8754 |
| 10 | 1157936 | 10:1157936  | SNV   | A | G   | 0/0/10 | 0/1/16 | 1      |
| 10 | 1158376 | rs2086382   | SNV   | G | A   | 0/3/7  | 0/7/10 | 0.6919 |
| 10 | 1159187 | rs56004802  | SNV   | T | C   | 0/2/8  | 0/1/16 | 0.535  |
| 10 | 1159566 | rs11250268  | SNV   | A | C   | 0/3/7  | 0/7/10 | 0.6919 |
| 10 | 1159648 | rs72760954  | SNV   | T | C   | 0/1/9  | 0/1/16 | 1      |
| 10 | 1160101 | rs184189632 | SNV   | T | C   | 0/1/5  | 0/0/16 | 0.2727 |
| 10 | 1160877 | rs117921987 | SNV   | C | T   | 0/0/10 | 0/4/13 | 0.2638 |
| 10 | 1161120 | rs10903371  | SNV   | T | C   | 2/4/4  | 4/6/7  | 1      |
| 10 | 1161653 | rs1079390   | SNV   | A | C   | 0/2/8  | 0/1/16 | 0.535  |
| 10 | 1161745 | rs1079387   | SNV   | A | G   | 0/1/9  | 0/7/10 | 0.1895 |
| 10 | 1161824 | rs1079388   | SNV   | G | A   | 2/4/4  | 4/6/7  | 1      |
| 10 | 1161980 | rs1079389   | SNV   | G | A   | 0/2/8  | 0/1/16 | 0.535  |
| 10 | 1162174 | rs2387297   | SNV   | C | T   | 0/5/5  | 0/7/10 | 0.7063 |
| 10 | 1162279 | rs2387298   | SNV   | T | C   | 0/1/9  | 0/1/15 | 1      |

|    |         |             |       |   |                      |        |        |        |
|----|---------|-------------|-------|---|----------------------|--------|--------|--------|
| 10 | 1162776 | rs117859365 | SNV   | T | C                    | 0/0/10 | 0/1/16 | 1      |
|    |         |             |       |   | GAGAATCC<br>TTGTCTCT |        |        |        |
| 10 | 1162846 | rs56702647  | INDEL | G | TACCAGCA             | 0/1/9  | 0/1/16 | 1      |
|    |         |             |       |   | GAGCAGC<br>GC        |        |        |        |
| 10 | 1163075 | rs10751791  | SNV   | A | G                    | 2/3/5  | 2/7/8  | 0.8719 |
| 10 | 1163427 | rs2387299   | SNV   | G | A                    | 0/2/8  | 0/1/16 | 0.535  |
| 10 | 1163598 | rs2387300   | SNV   | A | G                    | 0/2/8  | 0/0/17 | 0.1282 |
| 10 | 1163854 | rs11250269  | SNV   | G | A                    | 0/5/4  | 1/4/11 | 0.2839 |
| 10 | 1164969 | 10:1164969  | INDEL | G | GCCATT               | 0/1/9  | 0/0/17 | 0.3704 |
| 10 | 1165425 | rs74117849  | SNV   | G | A                    | 0/2/8  | 0/1/16 | 0.535  |
| 10 | 1165777 | rs74117850  | SNV   | C | T                    | 0/2/8  | 0/1/16 | 0.535  |
| 10 | 1166128 | rs79934515  | SNV   | T | C                    | 0/3/7  | 0/2/15 | 0.3261 |
| 10 | 1166318 | rs11250270  | SNV   | A | G                    | 0/2/8  | 0/5/12 | 0.6784 |
| 10 | 1166319 | rs11250271  | SNV   | A | G                    | 0/2/8  | 0/5/12 | 0.6784 |
| 10 | 1166400 | rs1871626   | SNV   | C | T                    | 2/3/5  | 2/7/8  | 0.8719 |
| 10 | 1166600 | rs59686718  | SNV   | A | G                    | 0/4/6  | 0/5/12 | 0.6831 |
| 10 | 1166687 | rs5014941   | SNV   | C | G                    | 2/3/5  | 2/7/8  | 0.8719 |
| 10 | 1167995 | 10:1167995  | SNV   | C | G                    | 0/1/4  | 0/0/15 | 0.25   |
| 10 | 1168026 | rs201454691 | INDEL | C | CGCATAGA             | 0/1/9  | 0/3/14 | 1      |
| 10 | 1168267 | rs7899518   | SNV   | C | A                    | 2/7/1  | 3/6/8  | 0.1639 |
| 10 | 1168503 | rs376019718 | SNV   | T | C                    | 0/1/9  | 0/1/16 | 1      |

|    |         |             |     |   |   |        |        |        |
|----|---------|-------------|-----|---|---|--------|--------|--------|
| 10 | 1168563 | rs6560711   | SNV | G | A | 0/2/8  | 0/5/12 | 0.6784 |
| 10 | 1169678 | rs370071628 | SNV | G | A | 0/1/5  | 0/0/16 | 0.2727 |
| 10 | 1169907 | rs72760963  | SNV | A | G | 0/1/9  | 0/1/16 | 1      |
| 10 | 1169992 | rs74591529  | SNV | T | C | 0/1/9  | 0/1/16 | 1      |
| 10 | 1170304 | rs7916430   | SNV | G | C | 0/2/8  | 0/6/11 | 0.6655 |
| 10 | 1170383 | 10:1170383  | SNV | C | A | 0/0/5  | 0/1/14 | 1      |
| 10 | 1170400 | rs72760964  | SNV | G | A | 0/1/9  | 0/1/16 | 1      |
| 10 | 1171266 | rs11250272  | SNV | C | G | 2/4/3  | 3/7/6  | 1      |
| 10 | 1171311 | rs11250273  | SNV | G | A | 2/4/3  | 3/7/6  | 1      |
| 10 | 1171352 | rs143017085 | SNV | C | G | 0/2/8  | 0/1/16 | 0.535  |
| 10 | 1171354 | rs11250274  | SNV | C | T | 0/0/10 | 0/1/16 | 1      |
| 10 | 1171734 | rs10903372  | SNV | T | C | 0/2/8  | 0/5/12 | 0.6784 |
| 10 | 1171822 | 10:1171822  | SNV | T | C | 0/1/4  | 0/0/15 | 0.25   |
| 10 | 1171823 | rs11250275  | SNV | A | G | 0/0/10 | 0/1/16 | 1      |
| 10 | 1172081 | rs141729568 | SNV | C | G | 0/0/10 | 0/1/16 | 1      |
| 10 | 1172094 | 10:1172094  | SNV | C | G | 0/0/10 | 0/1/16 | 1      |
| 10 | 1172095 | 10:1172095  | SNV | C | T | 0/0/10 | 0/1/16 | 1      |
| 10 | 1172172 | rs111964088 | SNV | C | T | 0/1/7  | 0/0/16 | 0.3333 |
| 10 | 1172198 | rs59259654  | SNV | C | T | 2/3/5  | 5/8/4  | 0.4721 |
| 10 | 1172203 | rs113900916 | SNV | G | A | 0/5/5  | 3/4/10 | 0.2186 |
| 10 | 1172208 | rs371089630 | SNV | C | T | 0/0/8  | 0/1/16 | 1      |
| 10 | 1172225 | rs71491340  | SNV | G | A | 0/0/10 | 0/1/16 | 1      |

|    |         |             |       |                            |         |        |        |         |
|----|---------|-------------|-------|----------------------------|---------|--------|--------|---------|
| 10 | 1172249 | rs7101147   | SNV   | G                          | A       | 0/7/2  | 1/7/8  | 0.2739  |
| 10 | 1172271 | rs7085880   | SNV   | G                          | A       | 4/2/4  | 1/9/7  | 0.09197 |
| 10 | 1172283 | rs12265731  | SNV   | C                          | T       | 0/1/9  | 0/1/16 | 1       |
| 10 | 1172294 | rs10794722  | SNV   | C                          | T       | 0/8/2  | 4/6/7  | 0.08242 |
| 10 | 1172308 | rs182624320 | SNV   | C                          | T       | 0/0/10 | 0/1/16 | 1       |
| 10 | 1172360 | rs369065820 | SNV   | A                          | G       | 0/1/9  | 0/1/16 | 1       |
| 10 | 1172589 | 10:1172589  | SNV   | G                          | A       | 0/1/9  | 0/0/17 | 0.3704  |
| 10 | 1172839 | rs7894626   | SNV   | A                          | C       | 1/7/2  | 5/7/5  | 0.4435  |
| 10 | 1172851 | rs10160136  | SNV   | T                          | C       | 2/5/3  | 1/8/8  | 0.5469  |
| 10 | 1173405 | rs11356997  | INDEL | C                          | CT      | 0/1/9  | 0/2/15 | 1       |
| 10 | 1173670 | rs4880770   | SNV   | A                          | G       | 0/3/7  | 1/8/8  | 0.6398  |
| 10 | 1173672 | rs4880771   | SNV   | T                          | C       | 0/3/7  | 1/8/8  | 0.6398  |
| 10 | 1173689 | rs10903373  | SNV   | T                          | C       | 0/3/7  | 2/7/8  | 0.5835  |
| 10 | 1173736 | 10:1173736  | SNV   | A                          | G       | 0/0/7  | 0/1/14 | 1       |
| 10 | 1174843 | 10:1174843  | INDEL | TCGGCGGT<br>CCATGCTC<br>GG | T       | 0/0/8  | 1/0/15 | 1       |
| 10 | 1174844 | 10:1174844  | SNV   | C                          | T       | 0/0/5  | 0/1/13 | 1       |
| 10 | 1174859 | 10:1174859  | SNV   | G                          | T       | 0/0/5  | 0/1/12 | 1       |
| 10 | 1174860 | 10:1174860  | SNV   | G                          | A       | 0/0/5  | 0/1/12 | 1       |
| 10 | 1174866 | 10:1174866  | INDEL | C                          | CATGGGG | 0/0/5  | 0/1/14 | 1       |
| 10 | 1175426 | rs184435191 | SNV   | G                          | C       | 0/0/7  | 0/1/14 | 1       |
| 10 | 1175894 | rs11250281  | SNV   | G                          | A       | 0/5/5  | 2/10/5 | 0.492   |



|    |         |             |       |   |    |       |        |        |
|----|---------|-------------|-------|---|----|-------|--------|--------|
| 10 | 1175939 | rs12359210  | SNV   | C | T  | 1/4/5 | 4/10/3 | 0.3118 |
| 10 | 1176813 | rs149181350 | INDEL | G | GC | 0/1/9 | 0/2/15 | 1      |
| 10 | 1177236 | rs76312690  | SNV   | T | C  | 0/1/9 | 0/2/15 | 1      |
| 10 | 1178211 | rs187772252 | SNV   | C | T  | 0/1/9 | 0/0/17 | 0.3704 |

---

\*: Statistically significant differences in the genetic variants between MCI-C and MCI-NC samples were assessed with the Fisher's exact test.
